# Supplementary material
Source: PubMed Central journal article supplement (PMC8033464)
Supplement: zsaa237_suppl_supplementary_materials.pdf [file zsaa237_suppl_supplementary_materials.pdf]

## **SUPPLEMENTARY MATERIAL**

### **Altered Circadian Activity and Sleep/Wake Rhythms in the Stable Tubule Only Polypeptide (STOP) Null Mouse Model of Schizophrenia**

Samuel Deurveilher, Kristin Robin Ko, Brock St. C Saumure, George S Robertson, Benjamin Rusak & Kazue Semba

#### **Supplementary Figures and Tables:**

- **Figure S1**
- **Figure S2**
- **Figure S3**
- **Figure S4**
- **Table S1**
- **Table S2**
- **Table S3**

## SUPPLEMENTARY FIGURE CAPTIONS

**Figure S1.** Examples of periodograms in the WT (**A**) and the two STOP KO (**B and C**) mice whose actograms are shown in Figure 1 for the 12/12 h light/dark (LD: *top*) and constant darkness (DD: *bottom*) conditions. The Qp values in the two KO mice (**B and C**) are plotted on a scale with smaller maximum than for the WT mouse (**A**) to facilitate visual detection of peak. The oblique line on the periodograms indicates significance at  $P < 0.05$ . The WT mouse in panel **A** maintained robust and relatively stable circadian rhythms of wheel-running activity under DD (see Figure 1A), as confirmed by a single, strong peak in its periodogram. The KO mouse in panel **B** maintained relatively clear, stable rhythms under DD (see Figure 1B), as confirmed by a single, smaller peak in its periodogram. The KO mouse in panel **C** showed less obvious rhythms in DD (see Figure 1C), and its periodogram showed a relatively flat spectrum with only a very weak peak in the circadian range.

**Figure S2.** Numbers and mean durations (seconds) of episodes during the 12 h light and 12 h dark phases in light/dark (LD) conditions and during the subjective day and night in constant darkness (DD) conditions for wake (**A and B**), NREMS (**C and D**), and REMS (**E and F**) in WT (white bars) and KO (black bars) mice. Data (means + SEM) were based on 2 successive 24 h periods in LD and 5 successive circadian cycles in DD and averaged for 12 h in LD or half a circadian cycle in DD in each animal. WT,  $n = 12$ ; KO,  $n = 12$ . \* $P < 0.05$  vs WT (two-tailed, unpaired t-tests).

**Figure S3.** Frequency histograms of the durations of sleep/wake episodes during the 12 h light and 12 h dark phases in light/dark (LD) conditions and during the subjective day and night in constant darkness (DD) conditions in WT (white bars) and KO (black bars) mice. Frequency histograms of wake **(A)**, NREMS **(B)**, and REMS **(C)** episodes are shown as a function of episode duration. All episodes of wake, NREMS, and REMS were sorted into 9 consecutive bins of logarithmically increasing duration. Data (means + SEM) were based on 2 successive 24 h periods in LD and 5 successive circadian cycles in DD and averaged for 12 h in LD or one-half of a circadian cycle in DD in each animal. WT, n = 12. KO, n = 12. \*P < 0.05 vs WT (Bonferroni *post hoc* t-tests).

**Figure S4.** The cosinor amplitudes of daily rhythms for wake **(A)**, NREMS **(B)**, and REMS amounts **(C)**, and NREMS EEG delta power **(D)** averaged over the 2 days of LD and the 5 days of DD in WT (white bars) and KO (black bars) mice. EEG power was normalized to the 48-h average in LD. Data are shown as means + SEM. WT, n = 12 (except n = 11 in D). KO, n = 12 (except n = 11 in D). \*P < 0.05 vs WT (two-tailed, unpaired t-tests).

Figure S1

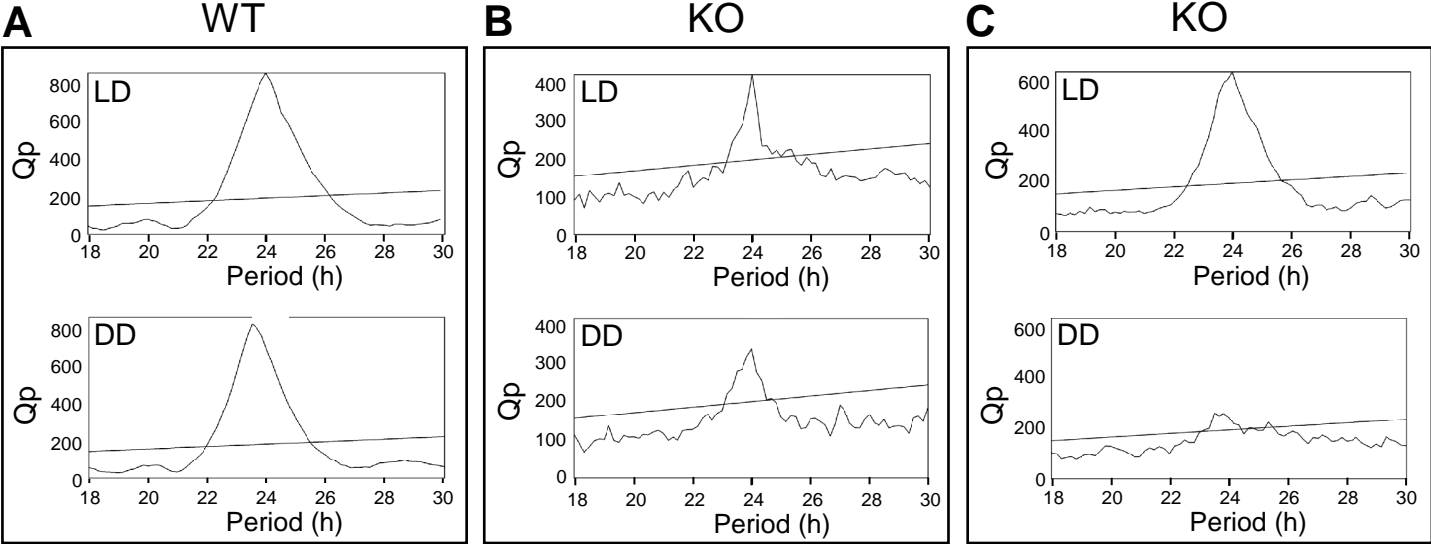

Figure S2

□ WT ■ KO

**A** Number of Wake Episodes

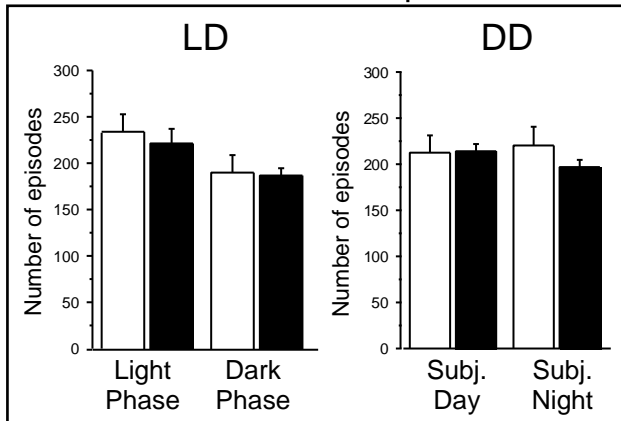

**B** Mean Duration of Wake Episodes

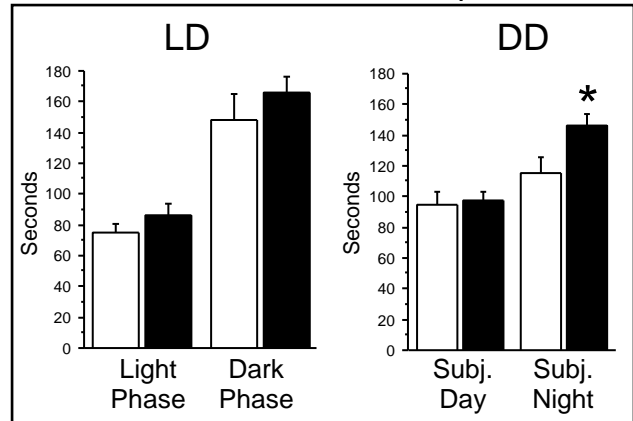

**C** Number of NREMS Episodes

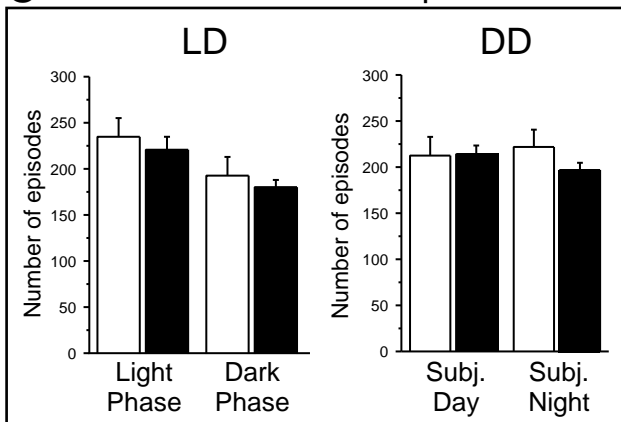

**D** Mean Duration of NREMS Episodes

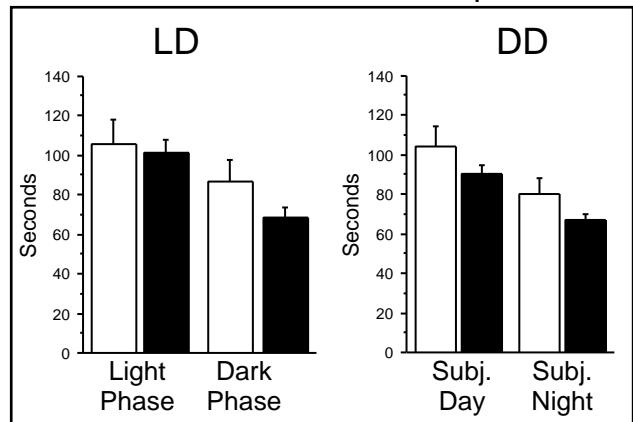

**E** Number of REMS Episodes

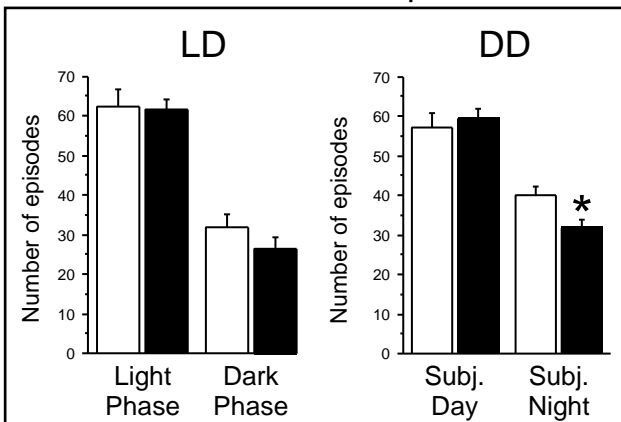

**F** Mean Duration of REMS Episodes

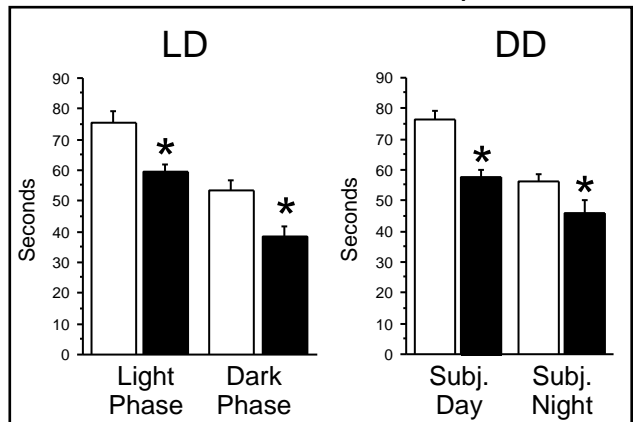

Figure S3

A  WT  KO

### Number of Wake Episodes

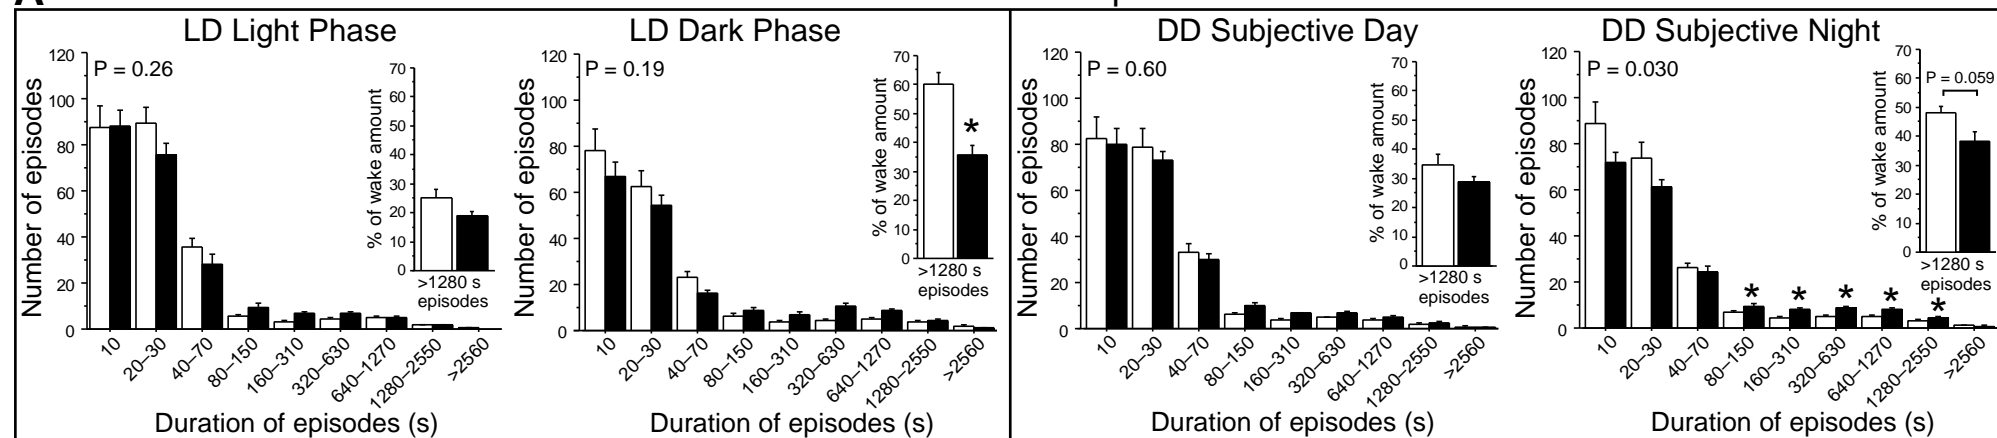

B

### Number of NREMS Episodes

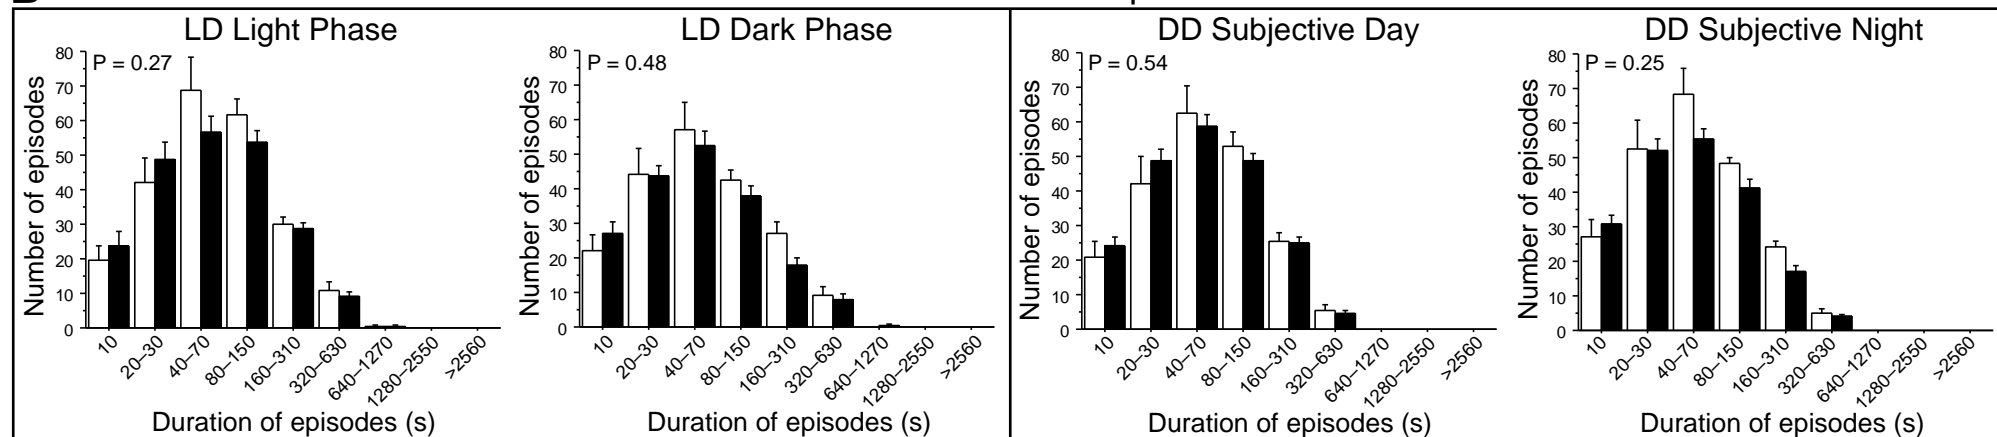

C

### Number of REMS Episodes

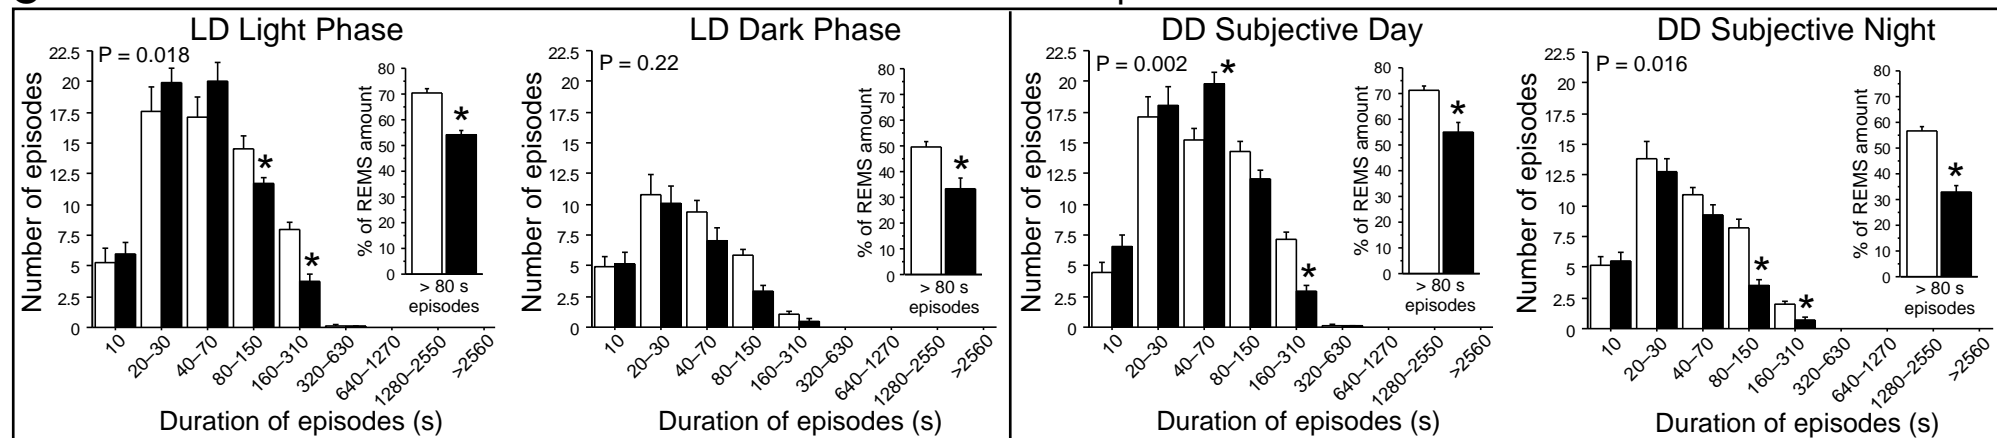

Figure S4

COSINOR ANALYSES

□ WT ■ KO

**A** Wake Rhythm Amplitude

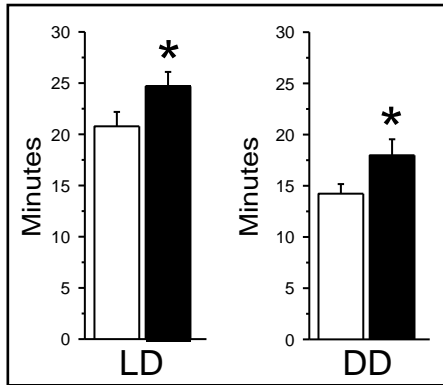

**B** NREMS Rhythm Amplitude

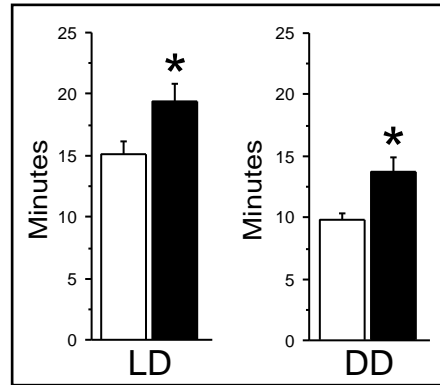

**C** REMS Rhythm Amplitude

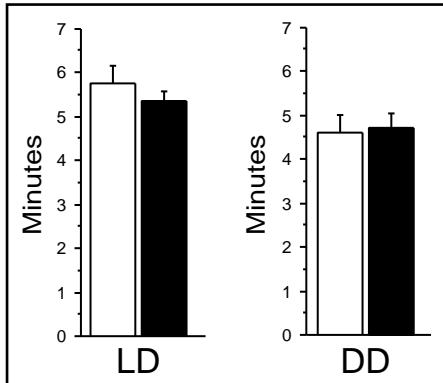

**D** NREMS Delta Power Rhythm Amplitude

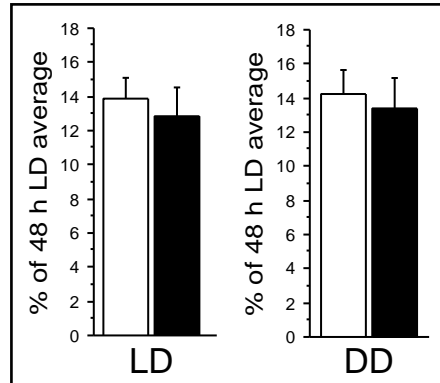

**Table S1.** Statistics for the data presented in Figures 2–7 and Figures S2–4

Statistical tests used for each figure with numbers of animals (n;n, KO;WT). df, degree of freedom. All t-tests are two-tailed. rANOVA, repeated ANOVA.

| Fig. #   | Panel                              | Test used                        | n     | t/F value & df                                                                                       | P value                                                                                                 |
|----------|------------------------------------|----------------------------------|-------|------------------------------------------------------------------------------------------------------|---------------------------------------------------------------------------------------------------------|
| 2        | A (LD)                             | unpaired t-tests                 | 14;13 | $t_{25} = 1.69$                                                                                      | $P = 0.12$                                                                                              |
| 2        | A (DD)                             | unpaired t-tests                 | 13;12 | $t_{23} = 2.75$                                                                                      | <b><math>P = 0.011</math></b>                                                                           |
| 2        | B                                  | unpaired t-tests                 | 13;12 | $t_{23} = 1.36$                                                                                      | $P = 0.19$                                                                                              |
| 2        | C (LD)                             | unpaired t-tests                 | 14;13 | $t_{25} = 14.18$                                                                                     | <b><math>P &lt; 0.0001</math></b>                                                                       |
| 2        | C (DD)                             | unpaired t-tests                 | 13;12 | $t_{23} = 12.12$                                                                                     | <b><math>P &lt; 0.0001</math></b>                                                                       |
| 2        | D (LD)                             | unpaired t-tests                 | 14;13 | $t_{25} = 8.89$                                                                                      | <b><math>P &lt; 0.0001</math></b>                                                                       |
| 2        | D (DD)                             | unpaired t-tests                 | 13;12 | $t_{23} = 17.26$                                                                                     | <b><math>P &lt; 0.0001</math></b>                                                                       |
| 2        | E                                  | unpaired t-tests                 | 14;13 | $t_{25} = 2.90$                                                                                      | <b><math>P = 0.077</math></b>                                                                           |
| 2        | F                                  | unpaired t-tests                 | 11;8  | $t_{17} < 1$                                                                                         | $P = 0.91$                                                                                              |
| <b>3</b> |                                    |                                  |       |                                                                                                      |                                                                                                         |
| 3        | A (LD)                             | unpaired t-tests                 | 14;13 | $t_{25} = 10.33$                                                                                     | <b><math>P &lt; 0.0001</math></b>                                                                       |
| 3        | A (DD)                             | unpaired t-tests                 | 13;12 | $t_{23} = 9.37$                                                                                      | <b><math>P &lt; 0.0001</math></b>                                                                       |
| 3        | B (LD)                             | unpaired t-tests                 | 14;13 | $t_{25} = 4.65$                                                                                      | <b><math>P &lt; 0.0001</math></b>                                                                       |
| 3        | B (DD)                             | unpaired t-tests                 | 13;12 | $t_{23} = 4.72$                                                                                      | <b><math>P &lt; 0.0001</math></b>                                                                       |
| 3        | C (LD) <i>left</i><br><i>right</i> | unpaired t-tests<br>2-way rANOVA | 14;13 | $t_{25} = 3.26$<br>Genotype x Bin: $F_{5,125} = 7.20$                                                | <b><math>P = 0.0032</math></b><br><b><math>P &lt; 0.0001</math></b>                                     |
| 3        | C (DD) <i>left</i><br><i>right</i> | unpaired t-tests<br>2-way rANOVA | 13;12 | $t_{23} = 4.02$<br>Genotype x Bin: $F_{5,115} = 7.11$                                                | <b><math>P = 0.0022</math></b><br><b><math>P &lt; 0.0001</math></b>                                     |
| 3        | D (LD)                             | unpaired t-tests                 | 14;13 | $t_{25} = 8.47$                                                                                      | <b><math>P &lt; 0.0001</math></b>                                                                       |
| 3        | D (DD)                             | unpaired t-tests                 | 13;12 | $t_{23} = 6.78$                                                                                      | <b><math>P &lt; 0.0001</math></b>                                                                       |
| <b>4</b> |                                    |                                  |       |                                                                                                      |                                                                                                         |
| 4        | A (LD)                             | 2-way rANOVA                     | 12;12 | Genotype: $F_{1,22} = 14.27$<br>Time: $F_{23,506} = 36.61$<br>Genotype x Time: $F_{23,506} = 1.30$   | <b><math>P = 0.001</math></b><br><b><math>P &lt; 0.0001</math></b><br>$P = 0.16$                        |
| 4        | A (DD)                             | 2-way rANOVA                     | 12;12 | Genotype: $F_{1,22} = 29.69$<br>Time: $F_{59,1298} = 15.48$<br>Genotype x Time: $F_{59,1298} = 1.43$ | <b><math>P &lt; 0.0001</math></b><br><b><math>P &lt; 0.0001</math></b><br><b><math>P = 0.020</math></b> |
| 4        | B (LD)                             | 2-way rANOVA                     | 12;12 | Genotype: $F_{1,22} = 6.05$<br>Time: $F_{23,506} = 28.78$<br>Genotype x Time: $F_{23,506} = 1.17$    | <b><math>P = 0.022</math></b><br><b><math>P &lt; 0.0001</math></b><br>$P = 0.26$                        |
| 4        | B (DD)                             | 2-way rANOVA                     | 12;12 | Genotype: $F_{1,22} = 13.63$<br>Time: $F_{59,1298} = 12.04$<br>Genotype x Time: $F_{59,1298} = 1.68$ | <b><math>P = 0.001</math></b><br><b><math>P &lt; 0.0001</math></b><br><b><math>P = 0.001</math></b>     |
| 4        | C (LD)                             | 2-way rANOVA                     | 12;12 | Genotype: $F_{1,22} = 25.81$<br>Time: $F_{23,460} = 42.66$<br>Genotype x Time: $F_{23,460} = 1.89$   | <b><math>P &lt; 0.0001</math></b><br><b><math>P &lt; 0.0001</math></b><br><b><math>P = 0.008</math></b> |
| 4        | C (DD)                             | 2-way rANOVA                     | 12;12 | Genotype: $F_{1,22} = 41.58$                                                                         | <b><math>P &lt; 0.0001</math></b>                                                                       |



|   |                 |                  |       |                                                                                                    |                                                                   |
|---|-----------------|------------------|-------|----------------------------------------------------------------------------------------------------|-------------------------------------------------------------------|
|   |                 |                  |       | Time: $F_{59,1298} = 19.07$<br>Genotype x Time: $F_{59,1298} < 1$                                  | <b>P &lt; 0.0001</b><br>P = 0.89                                  |
| 4 | D (LD)          | 2-way rANOVA     | 11;11 | Genotype: $F_{1,20} < 1$<br>Time: $F_{23,460} = 20.01$<br>Genotype x Time: $F_{23,460} = 1.20$     | P = 0.86<br><b>P &lt; 0.0001</b><br>P = 0.24                      |
| 4 | D (DD)          | 2-way rANOVA     | 11;11 | Genotype: $F_{1,20} < 1$<br>Time: $F_{59,1180} = 12.44$<br>Genotype x Time: $F_{59,1180} < 1$      | P = 0.57<br><b>P &lt; 0.0001</b><br>P = 0.88                      |
| 5 | A (LD)          | unpaired t-tests | 12;12 | Total: $t_{22} = 3.77$<br>Light: $t_{22} = 2.15$<br>Dark: $t_{22} = 3.12$                          | <b>P = 0.001</b><br><b>P = 0.043</b><br><b>P = 0.0049</b>         |
| 5 | A (DD)          | unpaired t-tests | 12;12 | Total: $t_{22} = 2.21$<br>Subj. Day: $t_{22} = 2.86$<br>Subj. Night: $t_{22} = 5.52$               | <b>P = 0.037</b><br><b>P = 0.009</b><br><b>P &lt; 0.0001</b>      |
| 5 | B (LD)          | unpaired t-tests | 12;12 | Total: $t_{22} = 2.45$<br>Light: $t_{22} < 1$<br>Dark: $t_{22} = 2.73$                             | <b>P = 0.023</b><br>P = 0.36<br><b>P = 0.012</b>                  |
| 5 | B (DD)          | unpaired t-tests | 12;12 | Total: $t_{22} = 4.11$<br>Subj. Day: $t_{22} = 1.94$<br>Subj. Night: $t_{22} = 5.02$               | <b>P = 0.0005</b><br>P = 0.065<br><b>P &lt; 0.0001</b>            |
| 5 | C (LD)          | unpaired t-tests | 12;12 | Total: $t_{22} = 5.10$<br>Light: $t_{22} = 4.41$<br>Dark: $t_{22} = 3.34$                          | <b>P &lt; 0.0001</b><br><b>P = 0.0002</b><br><b>P = 0.003</b>     |
| 5 | C (DD)          | unpaired t-tests | 12;12 | Total: $t_{22} = 6.95$<br>Subj. Day: $t_{22} = 4.15$<br>Subj. Night: $t_{22} = 5.61$               | <b>P &lt; 0.0001</b><br><b>P = 0.0004</b><br><b>P &lt; 0.0001</b> |
| 6 | A               | unpaired t-tests | 12;12 | $t_{22} = 5.20$                                                                                    | <b>P &lt; 0.0001</b>                                              |
| 6 | B (LD)          | unpaired t-tests | 12;12 | $t_{22} = 3.05$                                                                                    | <b>P = 0.0058</b>                                                 |
| 6 | B (DD)          | unpaired t-tests | 12;12 | $t_{22} = 3.74$                                                                                    | <b>P = 0.0011</b>                                                 |
| 6 | C (LD)          | unpaired t-tests | 12;12 | $t_{22} = 3.23$                                                                                    | <b>P = 0.0039</b>                                                 |
| 6 | C (DD)          | unpaired t-tests | 12;12 | $t_{22} = 3.80$                                                                                    | <b>P = 0.0010</b>                                                 |
| 6 | D (LD)          | unpaired t-tests | 12;12 | $t_{22} < 1$                                                                                       | P = 0.70                                                          |
| 6 | D (DD)          | unpaired t-tests | 12;12 | $t_{22} < 1$                                                                                       | P = 0.40                                                          |
| 6 | E (LD)          | unpaired t-tests | 11;11 | $t_{20} < 1$                                                                                       | P = 0.50                                                          |
| 6 | E (DD)          | unpaired t-tests | 11;11 | $t_{20} < 1$                                                                                       | P = 0.96                                                          |
| 7 | A (Light)       | 2-way rANOVA     | 11;11 | Genotype: $F_{1,20} < 1$<br>Bin: $F_{98,1960} = 201.4$<br>Genotype x Bin: $F_{98,1960} < 1$        | P = 0.44<br><b>P &lt; 0.0001</b><br>P = 0.71                      |
| 7 | A (Dark)        | 2-way rANOVA     | 11;11 | Genotype: $F_{1,20} < 1$<br>Bin: $F_{98,1960} = 197.0$<br>Genotype x Bin: $F_{98,1960} < 1$        | P = 0.40<br><b>P &lt; 0.0001</b><br>P = 0.73                      |
| 7 | A (Subj. Day)   | 2-way rANOVA     | 11;11 | Genotype: $F_{1,20} = 7.24$<br>Bin: $F_{98,1960} = 256.0$<br>Genotype x Bin: $F_{98,1960} = 3.17$  | <b>P = 0.014</b><br><b>P &lt; 0.0001</b><br><b>P = 0.027</b>      |
| 7 | A (Subj. Night) | 2-way rANOVA     | 11;11 | Genotype: $F_{1,20} = 12.90$<br>Bin: $F_{98,1960} = 306.6$<br>Genotype x Bin: $F_{98,1960} = 4.03$ | <b>P = 0.002</b><br><b>P &lt; 0.0001</b><br><b>P = 0.005</b>      |

|    |                 |                  |       |                                                                                                   |                                                                                                     |
|----|-----------------|------------------|-------|---------------------------------------------------------------------------------------------------|-----------------------------------------------------------------------------------------------------|
| 7  | B (Light)       | 2-way rANOVA     | 11;11 | Genotype: $F_{1,20} = 2.72$<br>Bin: $F_{98,1960} = 303.3$<br>Genotype x Bin: $F_{98,1960} = 2.03$ | $P = 0.11$<br><b><math>P &lt; 0.0001</math></b><br>$P = 0.13$                                       |
| 7  | B (Dark)        | 2-way rANOVA     | 11;11 | Genotype: $F_{1,20} < 1$<br>Bin: $F_{98,1960} = 184.9$<br>Genotype x Bin: $F_{98,1960} = 1.24$    | $P = 0.34$<br><b><math>P &lt; 0.0001</math></b><br>$P = 0.30$                                       |
| 7  | B (Subj. Day)   | 2-way rANOVA     | 11;11 | Genotype: $F_{1,20} = 3.66$<br>Bin: $F_{98,1960} = 243.2$<br>Genotype x Bin: $F_{98,1960} = 1.09$ | $P = 0.070$<br><b><math>P &lt; 0.0001</math></b><br>$P = 0.35$                                      |
| 7  | B (Subj. Night) | 2-way rANOVA     | 11;11 | Genotype: $F_{1,20} = 4.99$<br>Bin: $F_{98,1960} = 175.4$<br>Genotype x Bin: $F_{98,1960} = 1.54$ | <b><math>P = 0.037</math></b><br><b><math>P &lt; 0.0001</math></b><br>$P = 0.23$                    |
| 7  | C (Light)       | 2-way rANOVA     | 11;11 | Genotype: $F_{1,20} < 1$<br>Bin: $F_{98,1960} = 121.8$<br>Genotype x Bin: $F_{98,1960} < 1$       | $P = 0.34$<br><b><math>P &lt; 0.0001</math></b><br>$P = 0.46$                                       |
| 7  | C (Dark)        | 2-way rANOVA     | 11;11 | Genotype: $F_{1,20} < 1$<br>Bin: $F_{98,1960} = 107.0$<br>Genotype x Bin: $F_{98,1960} = 1.28$    | $P = 0.55$<br><b><math>P &lt; 0.0001</math></b><br>$P = 0.29$                                       |
| 7  | C (Subj. Day)   | 2-way rANOVA     | 11;11 | Genotype: $F_{1,20} = 15.4$<br>Bin: $F_{98,1960} = 172.7$<br>Genotype x Bin: $F_{98,1960} = 3.61$ | <b><math>P = 0.001</math></b><br><b><math>P &lt; 0.0001</math></b><br><b><math>P = 0.024</math></b> |
| 7  | C (Subj. Night) | 2-way rANOVA     | 11;11 | Genotype: $F_{1,20} = 15.3$<br>Bin: $F_{98,1960} = 149.2$<br>Genotype x Bin: $F_{98,1960} = 4.50$ | <b><math>P = 0.001</math></b><br><b><math>P &lt; 0.0001</math></b><br><b><math>P = 0.006</math></b> |
| 8  | A (LD)          | unpaired t-tests | 11;11 | Light: $t_{20} = 2.12$<br>Dark: $t_{20} = 2.37$                                                   | <b><math>P = 0.047</math></b><br><b><math>P = 0.028</math></b>                                      |
| 8  | A (DD)          | unpaired t-tests | 11;11 | Subj. Day: $t_{20} = 1.66$<br>Subj. Night: $t_{20} = 2.18$                                        | $P = 0.11$<br><b><math>P = 0.041</math></b>                                                         |
| 8  | B (LD)          | unpaired t-tests | 11;11 | Light: $t_{20} < 1$<br>Dark: $t_{20} < 1$                                                         | $P = 0.94$<br>$P = 0.90$                                                                            |
| 8  | B (DD)          | unpaired t-tests | 11;11 | Subj. Day: $t_{20} < 1$<br>Subj. Night: $t_{20} < 1$                                              | $P = 0.64$<br>$P = 0.96$                                                                            |
| 8  | C (LD)          | unpaired t-tests | 11;11 | Light: $t_{20} = 1.98$<br>Dark: $t_{20} < 1$                                                      | $P = 0.062$<br>$P = 0.54$                                                                           |
| 8  | C (DD)          | unpaired t-tests | 11;11 | Subj. Day: $t_{20} = 2.38$<br>Subj. Night: $t_{20} < 1$                                           | <b><math>P = 0.027</math></b><br>$P = 0.35$                                                         |
| S2 | A (LD)          | unpaired t-tests | 12;12 | Light: $t_{22} < 1$<br>Dark: $t_{22} < 1$                                                         | $P = 0.63$<br>$P = 0.84$                                                                            |
| S2 | A (DD)          | unpaired t-tests | 12;12 | Subj. Day: $t_{22} < 1$<br>Subj. Night: $t_{22} = 1.19$                                           | $P = 0.95$<br>$P = 0.25$                                                                            |
| S2 | B (LD)          | unpaired t-tests | 12;12 | Light: $t_{22} < 1$<br>Dark: $t_{22} = 1.28$                                                      | $P = 0.91$<br>$P = 0.23$                                                                            |
| S2 | B (DD)          | unpaired t-tests | 12;12 | Subj. Day: $t_{22} < 1$<br>Subj. Night: $t_{22} = 2.45$                                           | $P = 0.78$<br><b><math>P = 0.023</math></b>                                                         |
| S2 | C (LD)          | unpaired t-tests | 12;12 | Light: $t_{22} < 1$<br>Dark: $t_{22} < 1$                                                         | $P = 0.55$<br>$P = 0.57$                                                                            |
| S2 | C (DD)          | unpaired t-tests | 12;12 | Subj. Day: $t_{22} < 1$<br>Subj. Night: $t_{22} = 1.16$                                           | $P = 0.93$<br>$P = 0.26$                                                                            |

|    |                             |                                  |       |                                                            |                                          |
|----|-----------------------------|----------------------------------|-------|------------------------------------------------------------|------------------------------------------|
| S2 | D (LD)                      | unpaired t-tests                 | 12;12 | Light: $t_{22} < 1$<br>Dark: $t_{22} = 1.53$               | P = 0.79<br>P = 0.14                     |
| S2 | D (DD)                      | unpaired t-tests                 | 12;12 | Subj. Day: $t_{22} = 1.24$<br>Subj. Night: $t_{22} = 1.61$ | P = 0.23<br>P = 0.12                     |
| S2 | E (LD)                      | unpaired t-tests                 | 12;12 | Light: $t_{22} < 1$<br>Dark: $t_{22} = 1.23$               | P = 0.90<br>P = 0.23                     |
| S2 | E (DD)                      | unpaired t-tests                 | 12;12 | Subj. Day: $t_{22} < 1$<br>Subj. Night: $t_{22} = 2.84$    | P = 0.64<br><b>P = 0.010</b>             |
| S2 | F (LD)                      | unpaired t-tests                 | 12;12 | Light: $t_{22} = 3.79$<br>Dark: $t_{22} = 3.36$            | <b>P = 0.0010</b><br><b>P = 0.0028</b>   |
| S2 | F (DD)                      | unpaired t-tests                 | 12;12 | Subj. Day: $t_{22} = 4.92$<br>Subj. Night: $t_{22} = 2.12$ | <b>P &lt; 0.0001</b><br><b>P = 0.045</b> |
| S3 | A (Light)<br>(insert)       | 2-way rANOVA<br>unpaired t-tests | 12;12 | Genotype x Bin: $F_{8,176} = 1.38$<br>$t_{22} = 1.39$      | P = 0.26<br>P = 0.18                     |
| S3 | A (Dark)<br>(insert)        | 2-way rANOVA<br>unpaired t-tests | 12;12 | Genotype x Bin: $F_{8,176} = 1.77$<br>$t_{22} = 3.70$      | P = 0.19<br><b>P = 0.0012</b>            |
| S3 | A (Subj. Day)<br>(insert)   | 2-way rANOVA<br>unpaired t-tests | 12;12 | Genotype x Bin: $F_{8,176} < 1$<br>$t_{22} = 1.31$         | P = 0.60<br>P = 0.20                     |
| S3 | A (Subj. Night)<br>(insert) | 2-way rANOVA<br>unpaired t-tests | 12;12 | Genotype x Bin: $F_{8,176} = 2.20$<br>$t_{22} = 1.99$      | <b>P = 0.030</b><br>P = 0.059            |
| S3 | B (Light)                   | 2-way rANOVA                     | 12;12 | Genotype x Bin: $F_{8,176} = 1.35$                         | P = 0.27                                 |
| S3 | B (Dark)                    | 2-way rANOVA                     | 12;12 | Genotype x Bin: $F_{8,176} < 1$                            | P = 0.48                                 |
| S3 | B (Subj. Day)               | 2-way rANOVA                     | 12;12 | Genotype x Bin: $F_{8,176} < 1$                            | P = 0.54                                 |
| S3 | B (Subj. Night)             | 2-way rANOVA                     | 12;12 | Genotype x Bin: $F_{8,176} = 1.43$                         | P = 0.25                                 |
| S3 | C (Light)<br>(insert)       | 2-way rANOVA<br>unpaired t-tests | 12;12 | Genotype x Bin: $F_{8,176} = 3.41$<br>$t_{22} = 5.90$      | <b>P = 0.018</b><br><b>P &lt; 0.0001</b> |
| S3 | C (Dark)<br>(insert)        | 2-way rANOVA<br>unpaired t-tests | 12;12 | Genotype x Bin: $F_{8,176} = 1.53$<br>$t_{22} = 3.46$      | P = 0.22<br><b>P = 0.022</b>             |
| S3 | C (Subj. Day)<br>(insert)   | 2-way rANOVA<br>unpaired t-tests | 12;12 | Genotype x Bin: $F_{8,176} = 5.79$<br>$t_{22} = 4.04$      | <b>P = 0.002</b><br><b>P = 0.0005</b>    |
| S3 | C (Subj. Night)<br>(insert) | 2-way rANOVA<br>unpaired t-tests | 12;12 | Genotype x Bin: $F_{8,176} = 4.13$<br>$t_{22} = 7.55$      | <b>P = 0.016</b><br><b>P &lt; 0.0001</b> |
| S4 | A (LD)                      | unpaired t-tests                 | 12;12 | $t_{22} = 2.08$                                            | <b>P = 0.049</b>                         |
| S4 | A (DD)                      | unpaired t-tests                 | 12;12 | $t_{22} = 2.08$                                            | <b>P = 0.049</b>                         |
| S4 | B (LD)                      | unpaired t-tests                 | 12;12 | $t_{22} = 2.39$                                            | <b>P = 0.026</b>                         |
| S4 | B (DD)                      | unpaired t-tests                 | 12;12 | $t_{22} = 2.86$                                            | <b>P = 0.0091</b>                        |
| S4 | C (LD)                      | unpaired t-tests                 | 12;12 | $t_{22} < 1$                                               | P = 0.36                                 |
| S4 | C (DD)                      | unpaired t-tests                 | 12;12 | $t_{22} < 1$                                               | P = 0.87                                 |
| S4 | D (LD)                      | unpaired t-tests                 | 11;11 | $t_{20} < 1$                                               | P = 0.71                                 |
| S4 | D (DD)                      | unpaired t-tests                 | 11;11 | $t_{20} < 1$                                               | P = 0.65                                 |

**Table S2. Experiment 1: Body weights in the WT and STOP KO groups**

| Genotype | Body weight (g) |            |            |            |
|----------|-----------------|------------|------------|------------|
|          | Day 1           | Day 14     | Day 29     | Day 33     |
| WT       | 30.8 ± 1.4      | 29.9 ± 1.1 | 30.5 ± 1.2 | 30.3 ± 1.2 |
| KO       | 25.9 ± 1.2      | 25.5 ± 0.7 | 26.3 ± 0.6 | 26.7 ± 0.7 |

Means ± SEM are shown. The body weight of each mouse was recorded on the first day of the experiment (Day 1 in LD), at two time points during the experiment (Days 14 and 29 in LD and DD, respectively), and on the day following the end of the experiment (Day 33). KO mice had lower average body weights (by 15%) at the start of the experiment compared to WT mice. During the course of the experiment, despite the differences in the amount of wheel-running activity, both genotypes maintained respective pre-protocol weight levels similarly. WT, n = 13; KO, n = 12.

Repeated ANOVA (Factor Genotype:  $F_{1,23} = 9.14$ ,  $P = 0.0060$ ; Factor Day:  $F_{3,69} = 1.08$ ,  $P = 0.36$ ; Genotype x Day:  $F_{3,69} < 1$ ,  $P = 0.61$ )

**Table S3. Experiment 2: Body weights in the WT and STOP KO groups**

| Genotype | Body weight (g) |            |
|----------|-----------------|------------|
|          | Initial         | Final      |
| WT       | 39.9 ± 1.3      | 39.1 ± 1.0 |
| KO       | 28.9 ± 0.9      | 28.4 ± 0.9 |

Means ± SEM (n = 12/group) are shown. The body weight of each mouse was recorded on the first day of the habituation period ('Initial') and again 14–18 days later on the day following the end of the experiment ('Final'). KO mice had lower average body weights than WT mice at both the beginning and end of the experiment, as in Experiment 1.

There was a small but significant decrease (by ~2%) from the pre-protocol values in body weights in both genotypes. Repeated ANOVA (Factor Genotype:  $F_{1,22} = 10.69$ ,  $P = 0.0035$ ; Factor Day:  $F_{1,22} = 5.76$ ,  $P = 0.025$ ; Genotype x Day:  $F_{1,22} < 1$ ,  $P = 0.61$ )
